# Supplementary material
Source: PubMed Central journal article supplement (PMC8275672)
Supplement: 12264_2021_682_MOESM1_ESM.pdf [file 12264_2021_682_MOESM1_ESM.pdf]

# Supplementary Materials

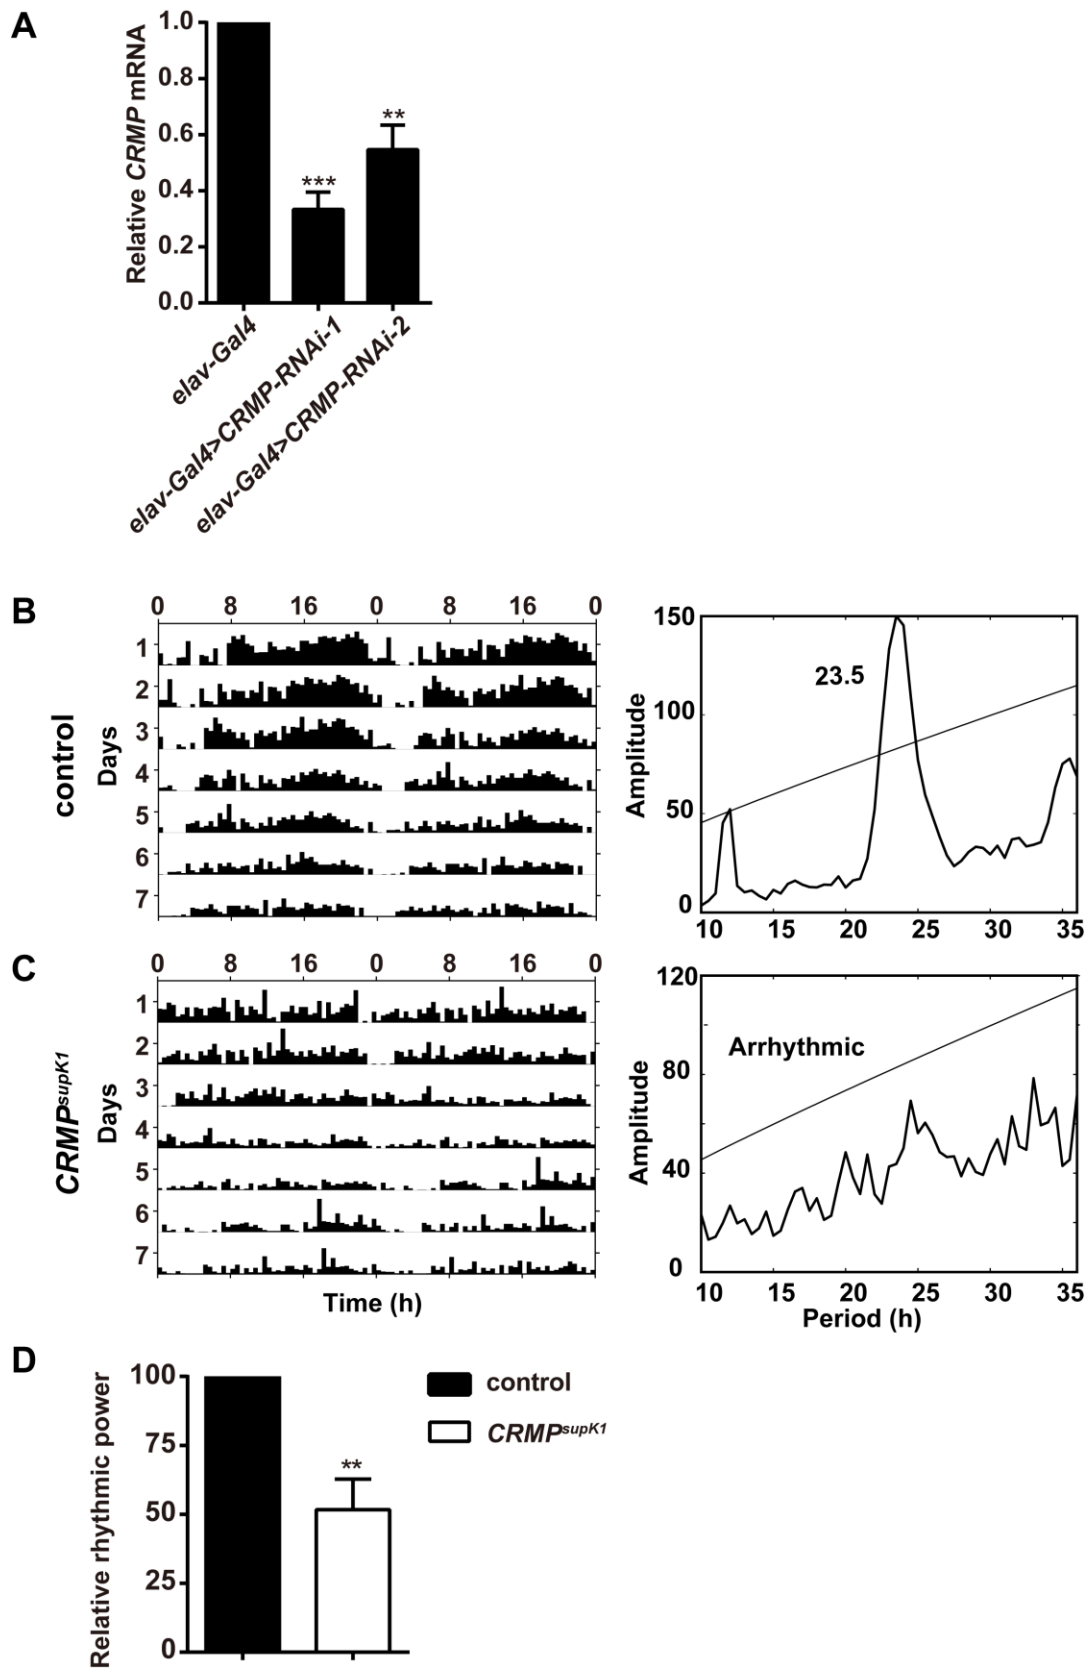

**Fig. S1 A** The relative *CRMP* mRNA levels in fly heads of *CRMP* RNAi lines driven by *elav-Gal4*. \*\* $P < 0.01$ , \*\*\* $P < 0.001$ , one-way ANOVA.  $n > 30$  flies per genotype. Data are shown as the mean  $\pm$  SEM. **B, C** Representative actograms and  $\chi^2$  periodograms from control flies (**B**) and *CRMP* mutant flies (**C**) in constant darkness. Control flies display a normal locomotor activity rhythm and *CRMP* mutant flies lose rhythmicity. **D** Relative rhythmic power of genotypes displayed in **B** and **C**. *CRMP* mutant flies show impaired circadian locomotor activity relative to control flies. \*\* $P < 0.01$ , unpaired *t*-test,  $n > 30$  flies per genotype. Data are shown as the mean  $\pm$  SEM.

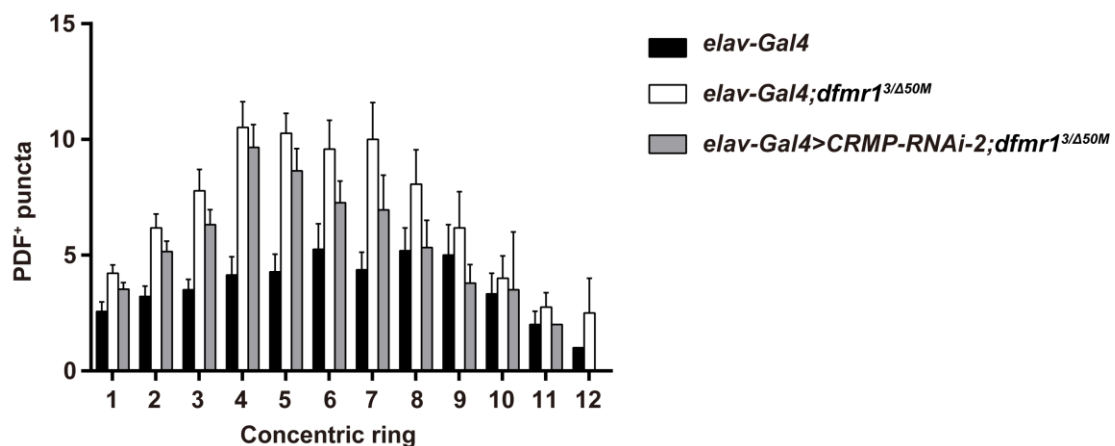

**Fig. S2** *CRMP-RNAi-2* rescues structural deficits of sLN<sub>v</sub> neurons in *dfmr1* mutants. Sholl analysis of the distribution of PDF-reactive puncta throughout the sLN<sub>v</sub> axonal arbors. The *CRMP-RNAi-2* line rescues the distribution defect in *dfmr1* mutant flies.  $n > 20$  hemispheres per genotype.

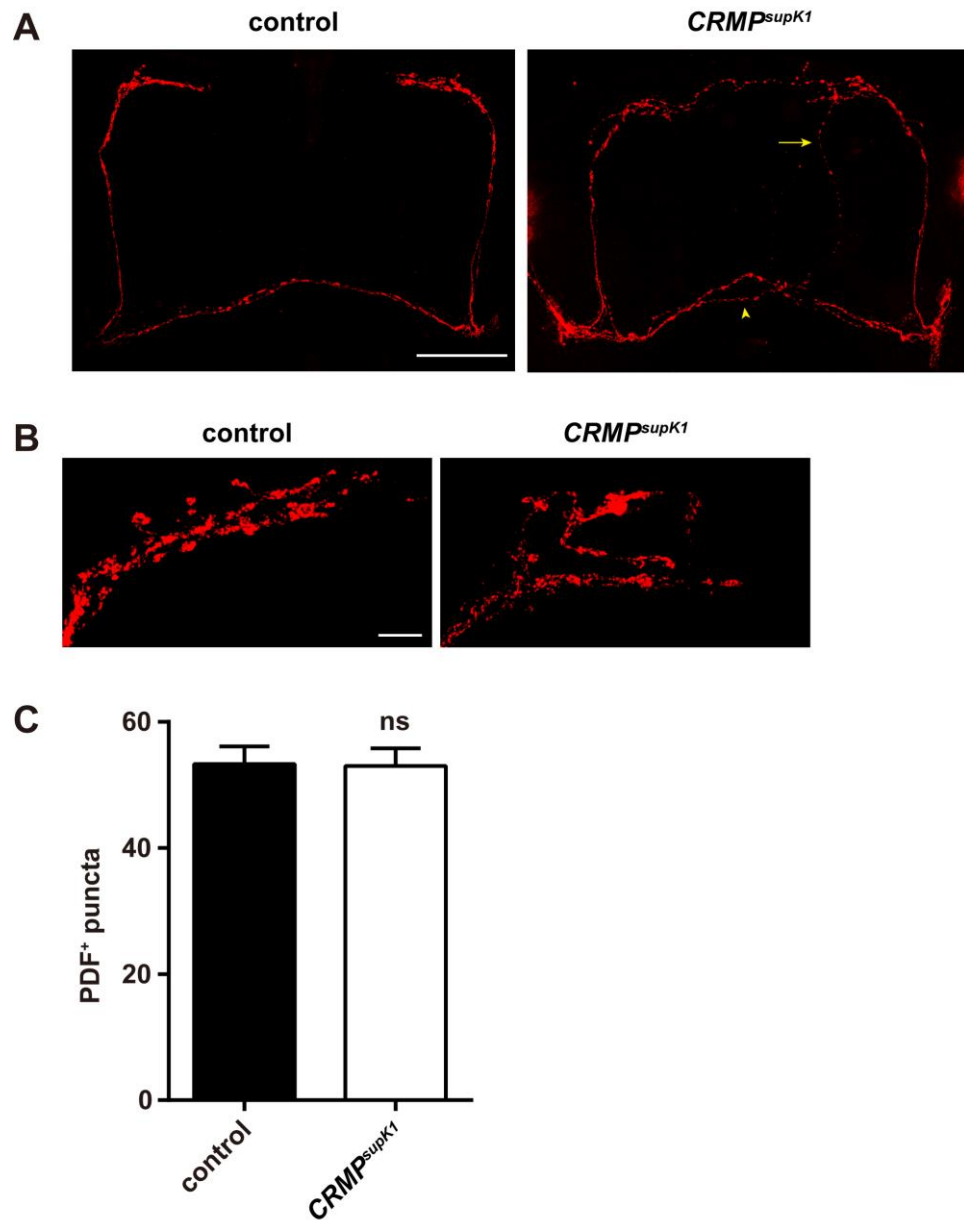

**Fig. S3** *CRMP* mutant flies display structural deficits in LN<sub>v</sub> neurons. **A** Representative split POT (arrow) and ectopic collateral branches (arrowhead) phenotype in *CRMP* mutant flies (scale bar, 75 μm). **B** *CRMP* mutant flies display normal terminal branch complexity (scale bar, 10 μm). **C** Total number of PDF puncta throughout the sLN<sub>v</sub> axonal arbors shows no difference between *CRMP* mutants and control flies. ns, not significant.

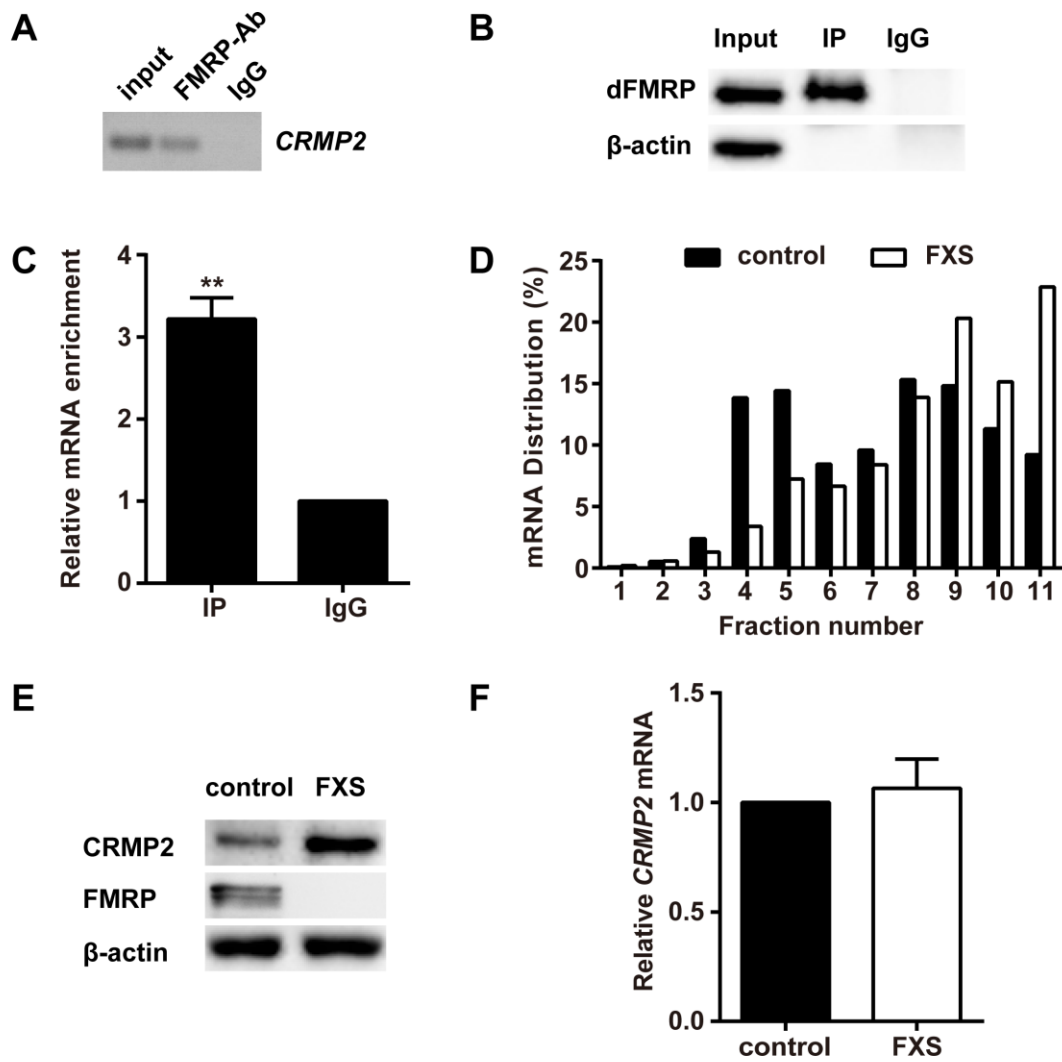

**Fig. S4** FMRP interacts with *CRMP* mRNA in *Drosophila* brains and CRMP2 protein levels are elevated in FXS lymphoblastoid cells. **A** Gel electrophoresis showing that *CRMP2* mRNAs are specifically bound to the FMRP antibody but not the negative control IgG in HEK293 cell lysates. **B** Western blots of dFMRP in S2 cells indicate dFMRP immunoprecipitation by anti-dFMRP antibody with specificity, using IgG as a negative control. **C** qPCR analysis of *CRMP* mRNA levels co-precipitated with dFMRP in *Drosophila* brains. *CRMP* mRNAs display an enrichment in dFMRP antibody precipitates compared to the negative control IgG. **D** qRT-PCR quantification of *CRMP2* mRNA levels in each fraction of sucrose gradients of normal and FXS patient-

derived lymphoblastoid cells. In the FXS lymphoblastoid cells there is a clearly enhanced association in the polysomal fractions of *CRMP2* mRNAs in comparison to normal cells. E Western blots from normal and FXS patient lymphoblastoid cells show that CRMP2 protein levels are increased in FXS lymphoblastoid cells.  $\beta$ -actin was used as a loading control. F qRT-PCR quantification of *CRMP2* mRNA expression in FXS cells. No significant difference in *CRMP2* mRNA expression between FXS and control cells. *GAPDH* was used as a reference gene.  $**P < 0.01$ , unpaired *t*-test,  $n = 3$  independent experiments. Data are represented as the mean  $\pm$  SEM.

**Table S1** Circadian phenotypes of *CRMP* mutants in constant darkness

| Genotype                    | Number | Average period (h) | % Arrhythmic flies |
|-----------------------------|--------|--------------------|--------------------|
| control                     | 65     | 24.08 $\pm$ 0.07   | 7.69%              |
| <i>CRMP<sup>supK1</sup></i> | 78     | 23.79 $\pm$ 0.09   | 39.74%             |

**Table S2** Penetrance of structural defects of LN<sub>v</sub>s

| Genotype                           | Number of brains | Collateral                               | POT splitting             |
|------------------------------------|------------------|------------------------------------------|---------------------------|
|                                    |                  | branching (percent of total half brains) | (percent of total brains) |
| <i>elav-Gla4</i>                   | 17               | 0                                        | 5.88%                     |
| <i>elav-Gal4;dfmr1<sup>-</sup></i> | 29               | 12.07%                                   | 68.97%                    |
| <i>elav-Gal4&gt;CRMP-RNAi-</i>     | 22               | 0                                        | 27.27%                    |

*1;dfmr1<sup>3</sup>/dfmr1<sup>450M</sup>*

*elav-Gal4>CRMP-RNAi-* 24 0 29.17%

*2;dfmr1<sup>3</sup>/dfmr1<sup>450M</sup>*

*elav-Gal4>CRMP-RNAi-1* 23 0 17.39%

*elav-Gal4>CRMP-RNAi-2* 21 0 14.28%

control 15 3.33% 40.00%

*CRMP<sup>supK1</sup>* 20 40.00% 80.00%

---
